# Supplementary material for: Environmental Co-Exposure to Potassium Perchlorate and Cd Caused Toxicity and Thyroid Endocrine Disruption in Zebrafish Embryos and Larvae (Danio rerio)
Source: MDPI journal article supplement (doi:10.3390/toxics10040198), 2022-04-18
Supplement: s1 [file s1]

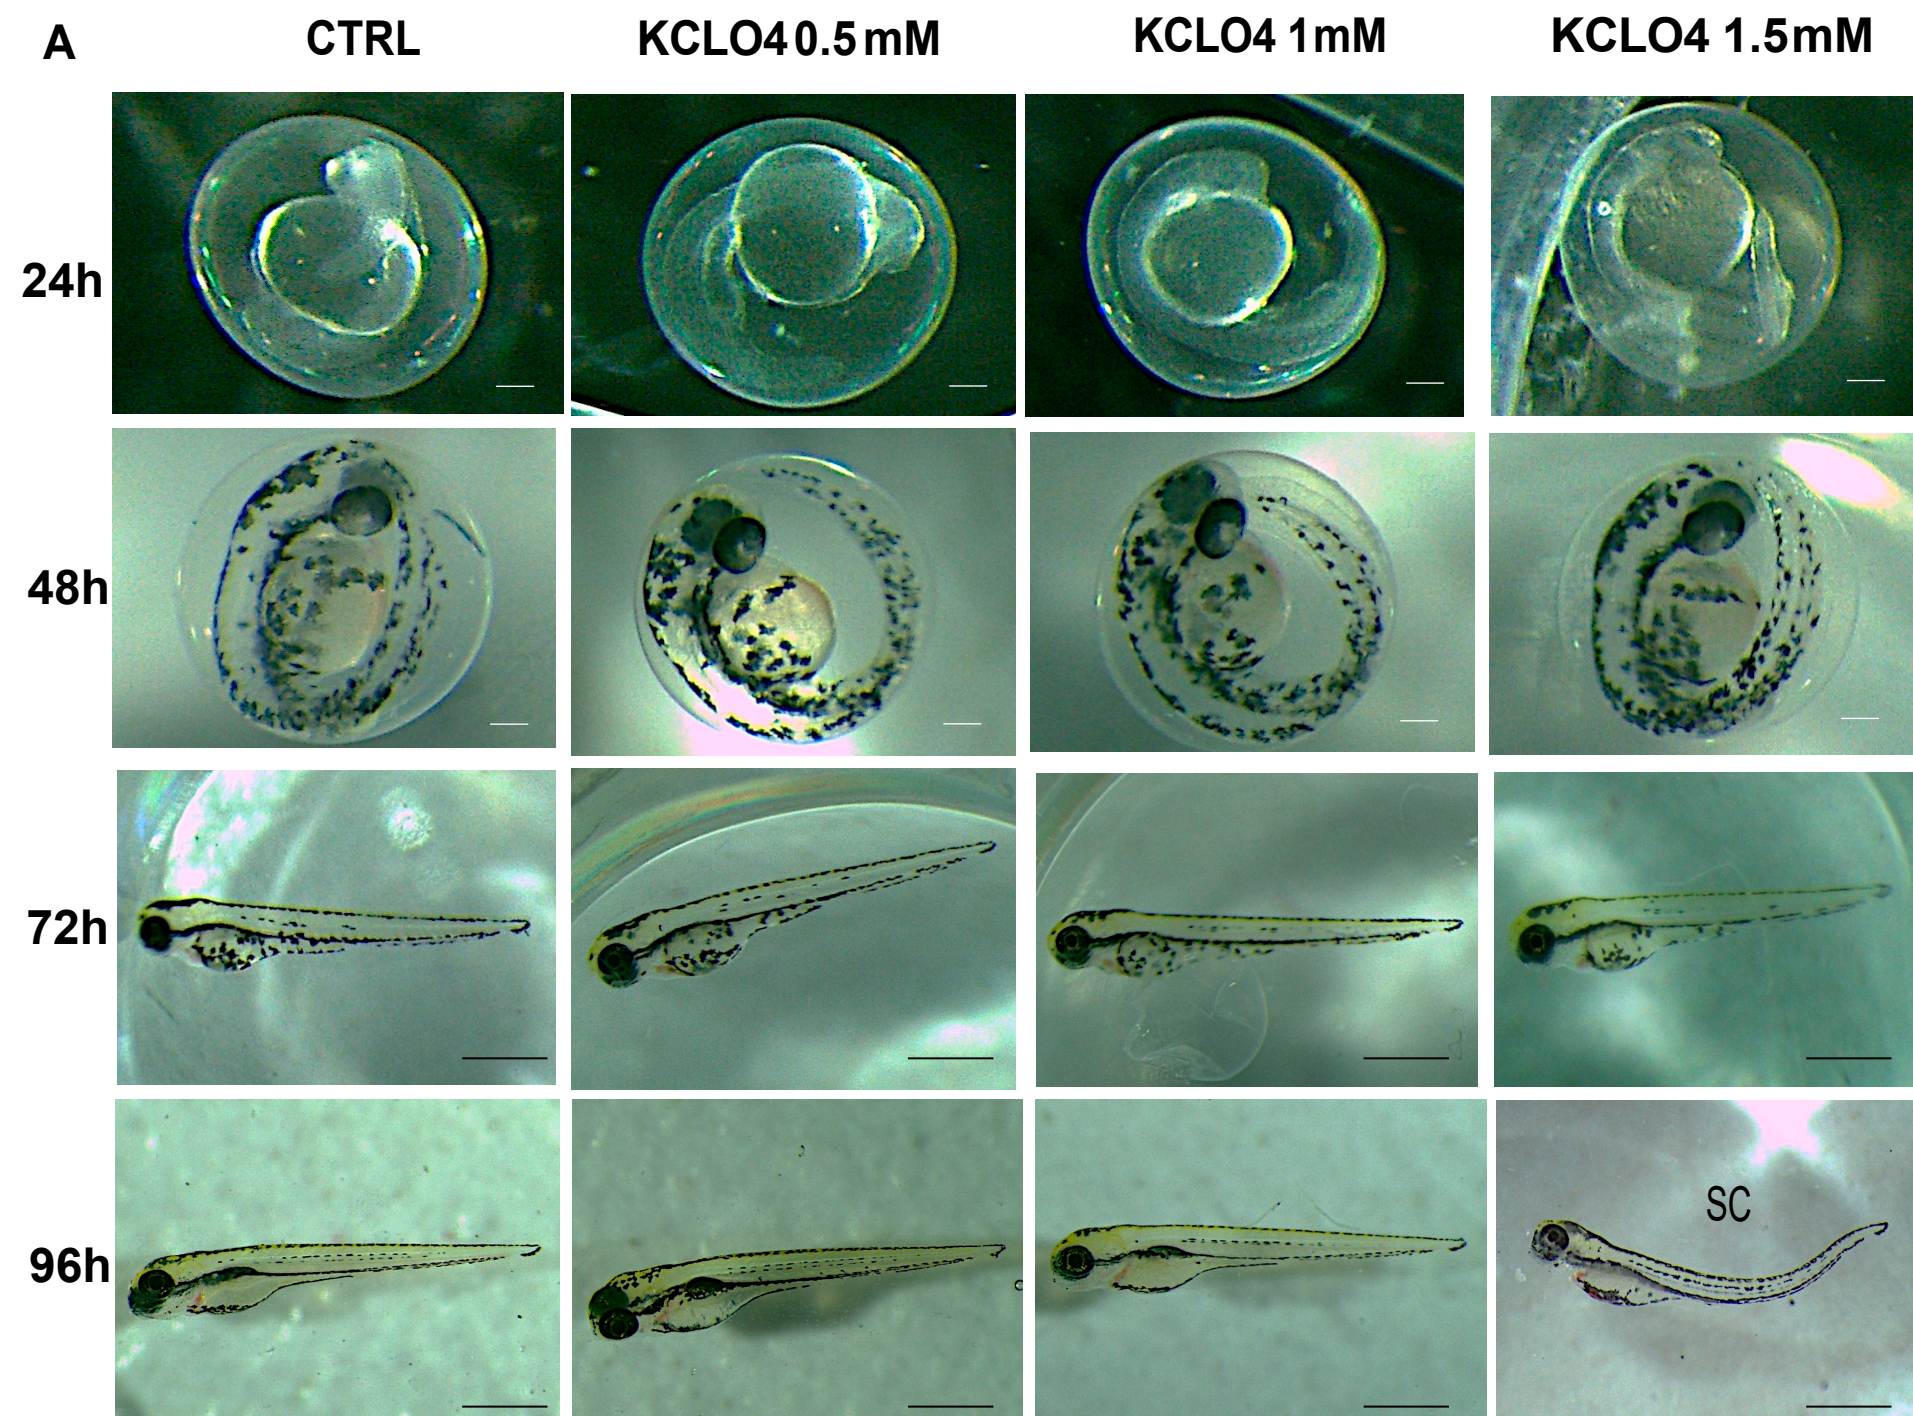

**Figure S1.** The morphological defections in zebrafish caused by KClO<sub>4</sub> different concentrations exposure. SC – Scoliosis. Images were taken from the lateral view under a dissecting microscope (magnification 25). Scale bar, 500 mm.
